# Supplementary material for: Cold Exposure Promotes Atherosclerotic Plaque Growth and Instability via UCP1-Dependent Lipolysis
Source: Cell Metab. 2013 Jul 2;18(1):118–29. doi: 10.1016/j.cmet.2013.06.003 (PMC3701322; doi:10.1016/j.cmet.2013.06.003)
Supplement: Document S1. Supplemental Experimental Procedures, Figures S1–S4, and Table S1 [file mmc1.pdf]

**Cell Metabolism, Volume 18**

**Supplemental Information**

**Cold Exposure Promotes**

**Atherosclerotic Plaque Growth and Instability**

**via UCP1-Dependent Lipolysis**

Mei Dong, Xiaoyan Yang, Sharon Lim, Ziquan Cao, Jennifer Honek, Huixia Lu, Cheng Zhang, Takahiro Seki, Kayoko Hosaka, Eric Wahlberg, Jianmin Yang, Lei Zhang, Toste Länne, Baocun Sun, Xuri Li, Yizhi Liu, Yun Zhang, and Yihai Cao

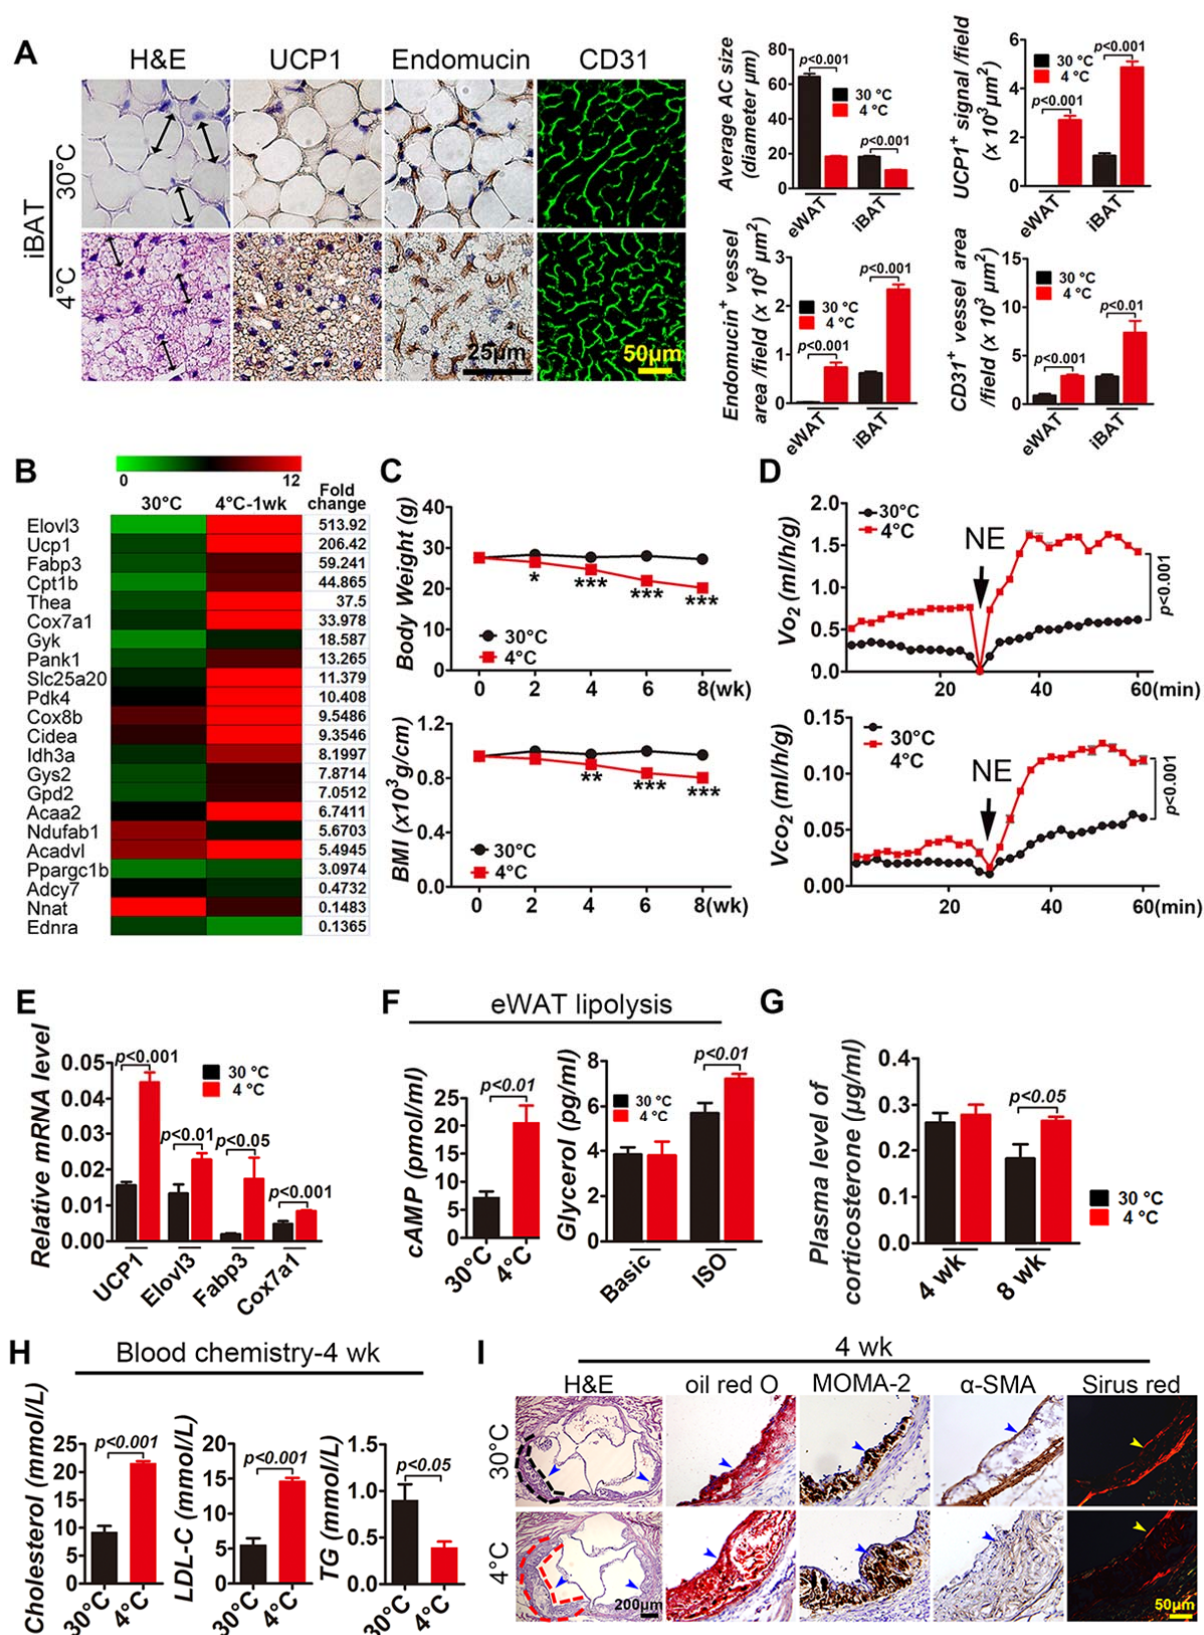

Figure S1

**Figure S1. Cold-Induced WAT-BRITE Conversion, BAT Activation, Blood Chemistry, and Atherosclerotic Plaque in 4-Week-Old ApoE<sup>-/-</sup> Mice, Related to Figure 1**

(A) Tissue sections of iBAT exposed to 4°C or 30°C for 4 wk were stained with H&E, mitochondrial UCP1, endomucin, and CD31. Double-arrowed bars indicate diameters in some adipocytes. Average diameters of adipocytes of 4-wk-4°C- or 4-wk-30°C-eWAT and -iBAT (10 random fields/group x 5 mice). Quantification of UCP1<sup>+</sup> signals, endomucin<sup>+</sup> and CD31<sup>+</sup> microvessel density of 4-wk-4°C- or 4-wk-30°C-eWAT and -iBAT (10 random fields/group x 5 mice). (B) Expression profiles of lipolysis-related genes in 1-wk-4°C- and 1-wk-30°C- iWAT (3 repeats/group). (C) Body weight and BMI of pair-fed 4°C- and 30°C-ApoE<sup>-/-</sup> mice (n=20/group). \*p<0.05; \*\*\*p<0.001. (D) Metabolic rate of O<sub>2</sub> consumption and CO<sub>2</sub> production in response to NE of pair-fed 4°C- and 30°C-ApoE<sup>-/-</sup> mice (n=7/group). (E) qPCR analysis of expression levels of lipolysis-related genes in 4-wk-4°C- and 4-wk-30°C-iWAT of ApoE<sup>-/-</sup> mice (n=6/group). (F) Measurement of cAMP and glycerol levels in 4-wk-4°C- and 4-wk-30°C-eWAT (n=5/group). (G) Measurement of plasma levels of corticosterone in 4°C- and 30°C-exposed groups of ApoE<sup>-/-</sup> mice (n=10/group). (H) Blood chemistry analysis of TG, cholesterol, LDL-cholesterol and glycerol (n=10/group). (I) Histological analysis of 30°C-, 4°C-aorta roots stained with H&E, Oil Red O, MOMA-2, α-SMA, or Sirius Red. (n=10/group).

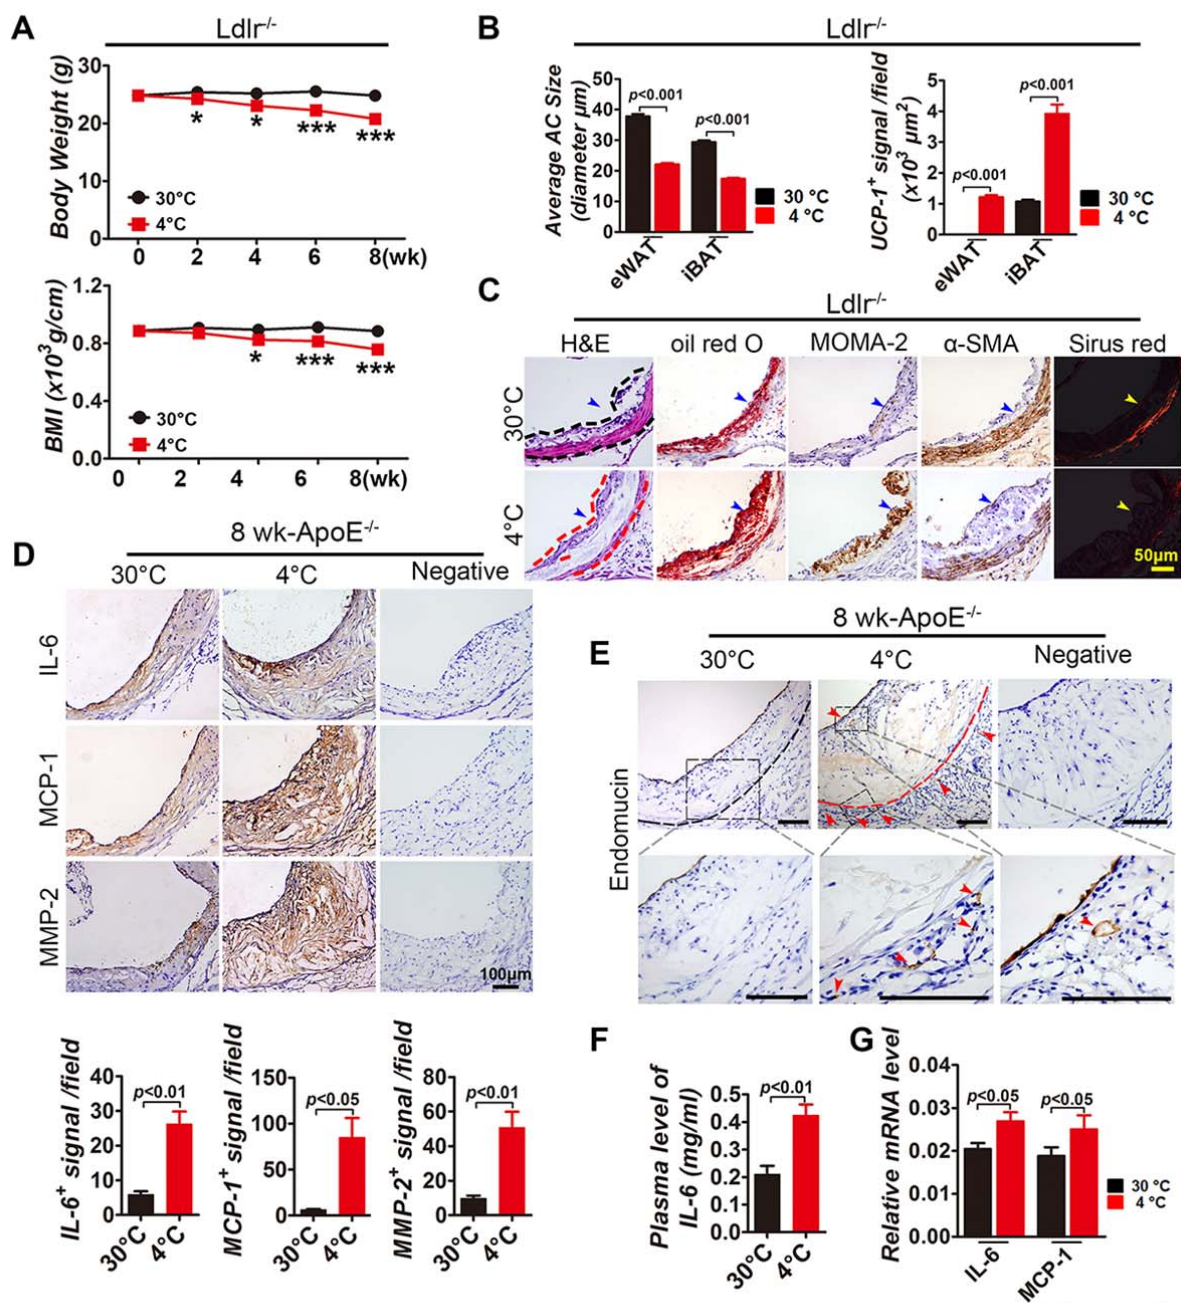

Figure S2

**Figure S2. Cold-Induced Body Weight, BMI, Adipocyte, and Atherosclerotic Plaque in  $Ldlr^{-/-}$  Mice; Inflammation-Related Cytokines and Angiogenesis in Cold-Exposed 8-Week-Old  $ApoE^{-/-}$  Mice, Related to Figure 2**

(A) Body weight and BMI of pair-fed 4°C- and 30°C- $Ldlr^{-/-}$  mice (n=20/group). \* $p<0.05$ ; \*\*\* $p<0.001$ . (B) Average diameters of adipocytes and quantification of UCP1<sup>+</sup> signals of 8-wk-4°C- or 8-wk-30°C-eWAT and -iBAT (10 random fields/group x 5 mice). (C) Histological analysis of 8-wk-4°C- and 8-wk-30°C-aorta roots by staining with H&E, Oil Red O, MOMA-2,  $\alpha$ -SMA, or Sirius Red. Dashed lines encircle some parts of atherosclerotic plaques and arrowheads in different panels point to positive signals (n=8/group). (D) Histological analysis and its quantification of 8-wk-4°C- and 8-wk-30°C-aorta roots by staining with IL-6, MCP-1 and MMP-2 (n=10/group). Non-immune IgG was used as negative controls. (E) Endomucin<sup>+</sup> microvessels were present within the atherosclerotic plaques and in the adventitial region of 8-wk-4°C-atherosclerotic plaques. Non-immune IgG was used as negative controls. Dashed lines encircle some parts of atherosclerotic plaques and arrowheads in different panels point to positive signals (n=10/group). Scale bars in all panels are 100  $\mu$ m. (F) Expression level of circulating IL-6 of 8-wk-4°C- and 8-wk-30°C- $ApoE^{-/-}$  mice (n=10/group). (G) qPCR analysis of expression levels of IL-6 and MCP-1 in 8-wk-4°C- and 8-wk-30°C-iWAT (n=6/group).

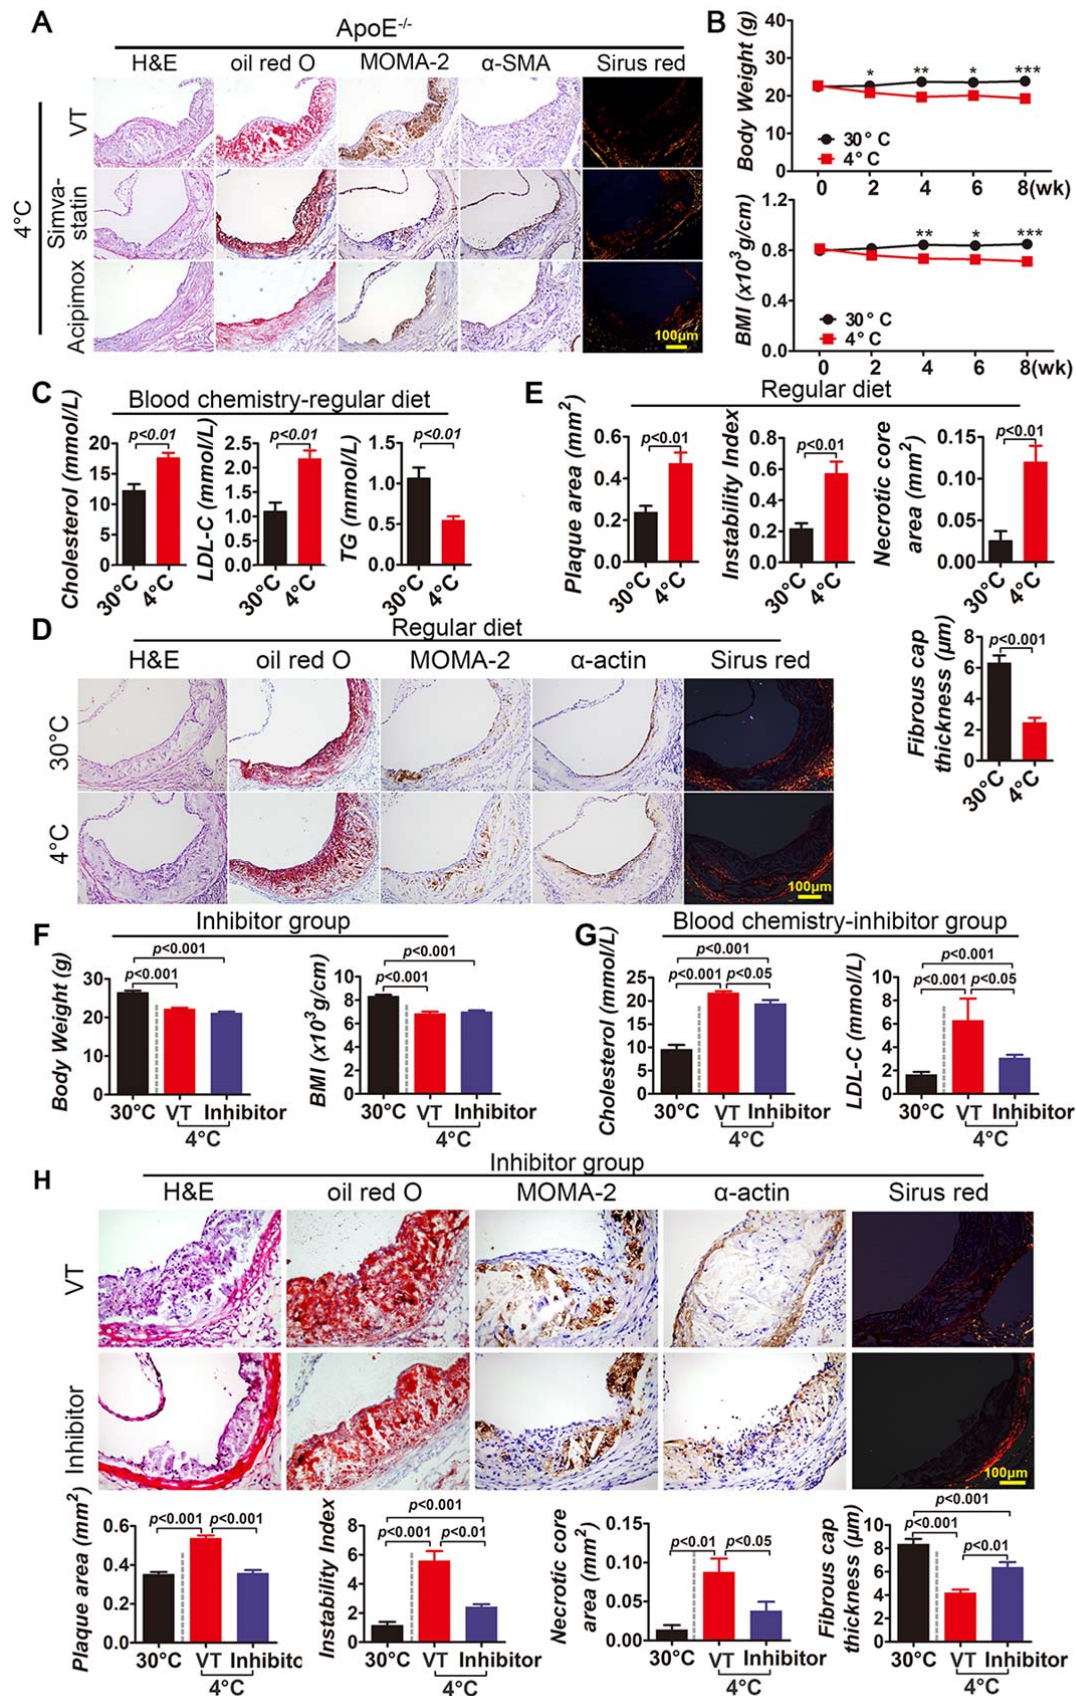

Figure S3

**Figure S3. Antiatherosclerotic Effects by Simvastatin and Acipimox; Cold-Induced Alteration of Body Weight, BMI, Blood Chemistry, and Atherosclerotic Plaques in Regular Diet-Fed ApoE<sup>-/-</sup> Mice and SR-59230A-Treated ApoE<sup>-/-</sup> Mice, Related to Figure 3**

(A) Histological analysis of vehicle-, simvastatin- and acipimox-treated groups stained with H&E, Oil Red O, MOMA-2,  $\alpha$ -SMA, or Sirius Red. (n=10/group). (B) Body weight and BMI of 8 wk-30°C-, 8 wk-4°C-pair-fed-ApoE<sup>-/-</sup> mice with regular diet (n=10/group). (C) Blood chemistry of 30°C-, 4°C-exposed groups with regular diet (n=10/group). (D) Histological analysis of 30°C-, 4°C-aorta roots stained with H&E, Oil Red O, MOMA-2,  $\alpha$ -SMA, or Sirius Red. (n=10/group). (E) Quantification of plaque areas, instability index, necrotic core area and fibrous cap thickness of 30°C-, 4°C-exposed groups (n=10/group). (F) Body weight and BMI of pair-fed 4 wk-4°C-control- and 4 wk-4°C- SR-59230A-treated ApoE<sup>-/-</sup> mice (n=10/group). (G) Blood chemistry of vehicle- and SR-59230A-treated groups (n=10/group). (H) Histological analysis of vehicle- and SR-59230A-treated groups stained with H&E, Oil Red O, MOMA-2,  $\alpha$ -SMA, or Sirius Red. (n=10/group). Quantification of plaque areas, instability index, necrotic core area and fibrous cap thickness of vehicle- and SR-59230A-treated groups (n=10/group). VT=vehicle-treated; inhibitor=SR-59230A-treated.

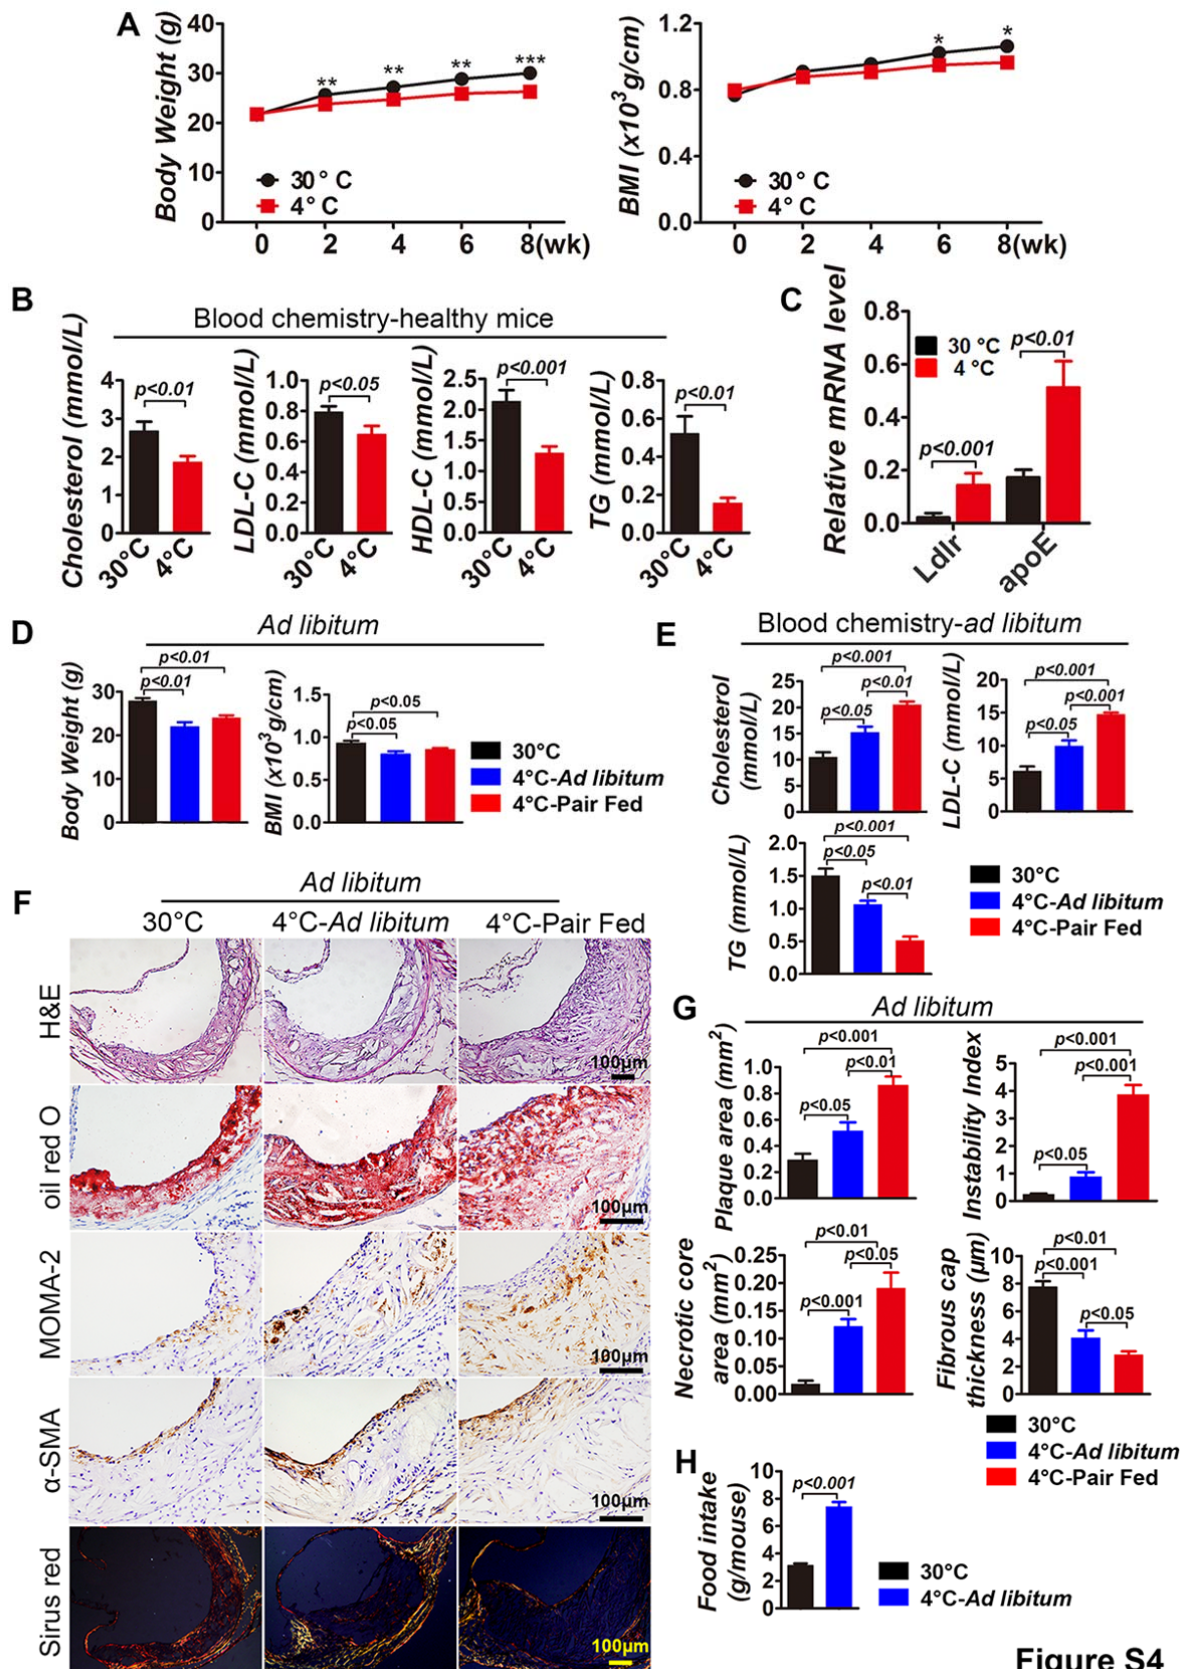

Figure S4

**Figure S4. Cold-Induced Alterations of Body Weight, BMI, Blood Chemistry, and Atherosclerotic Plaques in Wild-Type Mice and Ad Libitum Fed Mice, Related to Figure 4**

(A) Body weight and BMI of 8 wk-30°C-, 8 wk-4°C-pair-fed-wt mice (n=10/group). (B) Blood chemistry of 8 wk-30°C-, 8 wk-4°C-pair-fed-wt mice (n=10/group). (C) Hepatic mRNA levels of Ldlr and ApoE of 8 wk-30°C-, 8 wk-4°C-pair-fed-wt mice (n=10/group). (D) Body weight and BMI of 8 wk-30°C-, 8 wk-4°C-pair-fed- and 8 wk-4°C-*ad-libitum*-fed ApoE<sup>-/-</sup> mice (n=10/group). (E) Blood chemistry of 30°C-, 4°C-pair-fed- and 4°C-*ad-libitum*-fed ApoE<sup>-/-</sup> mice (n=10/group). (F) Histological analysis of 30°C-, 4°C-pair-fed- and 4°C-*ad-libitum*-fed aorta roots stained with H&E, Oil Red O, MOMA-2, α-SMA, or Sirius Red. (n=10/group). (G) Quantification of plaque areas, instability index, necrotic core area and fibrous cap thickenss of 30°C-, 4°C-pair-fed- and 4°C-*ad-libitum*-fed ApoE<sup>-/-</sup> mice (n=10/group). (H) Quantification of daily food intake of 30°C- and 4°C-*ad-libitum*-fed ApoE<sup>-/-</sup> mice (n=10/group).

**Table S1. Clinical Characteristics and Blood Chemistry Parameters before Cold Exposure, Related to Figure 4G**

| Subject No. | Gender      | Age (years) | Smoking history | Drinking history | Medication history | Diabetes history | TC (mmol/L) | LDL-C (mmol/L) | HDL-C (mmol/L) | TG (mmol/L) |
|-------------|-------------|-------------|-----------------|------------------|--------------------|------------------|-------------|----------------|----------------|-------------|
| 1           | Male        | 39          | Y               | N                | N                  | N                | 3.92        | 3.01           | 1.16           | 1.26        |
| <b>2 #</b>  | <b>Male</b> | <b>41</b>   | <b>N</b>        | <b>N</b>         | <b>N</b>           | <b>N</b>         | <b>5.00</b> | <b>3.61</b>    | 1.05           | 1.57        |
| <b>3 #</b>  | <b>Male</b> | <b>46</b>   | <b>N</b>        | <b>N</b>         | <b>N</b>           | <b>N</b>         | <b>6.76</b> | <b>4.24</b>    | 1.25           | 1.89        |
| 4           | Male        | 43          | N               | N                | N                  | N                | 4.21        | 2.32           | 1.21           | 1.35        |
| 5           | Male        | 42          | N               | N                | N                  | N                | 3.68        | 1.97           | 1.46           | 0.81        |
| 6           | Male        | 47          | Y               | N                | N                  | N                | 4.86        | 3.16           | 1.21           | 1.11        |
| <b>7 #</b>  | <b>Male</b> | <b>44</b>   | <b>N</b>        | <b>N</b>         | <b>N</b>           | <b>N</b>         | <b>5.32</b> | <b>3.79</b>    | 1.12           | 1.47        |
| 8           | Male        | 40          | N               | N                | N                  | N                | 3.55        | 1.89           | 1.42           | 1.38        |
| 9           | Male        | 42          | N               | N                | Y                  | N                | 4.11        | 2.35           | 1.26           | 1.17        |
| <b>10 #</b> | <b>Male</b> | <b>45</b>   | <b>N</b>        | <b>N</b>         | <b>N</b>           | <b>N</b>         | <b>6.61</b> | <b>4.56</b>    | 1.01           | 1.77        |
| 11          | Male        | 41          | N               | Y                | N                  | N                | 3.75        | 2.05           | 1.45           | 1.58        |
| <b>12 #</b> | <b>Male</b> | <b>43</b>   | <b>N</b>        | <b>N</b>         | <b>N</b>           | <b>N</b>         | <b>5.93</b> | <b>4.12</b>    | 1.04           | 1.62        |
| 13          | Male        | 40          | N               | Y                | N                  | N                | 3.52        | 1.81           | 1.57           | 0.94        |
| 14          | Male        | 44          | N               | N                | N                  | N                | 4.02        | 2.13           | 1.39           | 1.22        |

If the volunteer subjects have any smoking ,drinking, medication history (statins) in the past two months, and any diabetic or other disease history, Y is short for Yes, and N stands for No. The volunteer subjects' numbers with # are those individuals who were chosen for this study.

## **Supplemental Experimental Procedures**

### **Animals and Human Subjects**

Male wild type (*wt*) and ApoE<sup>-/-</sup> mice in C57BL/6 background at the age of 8-wk were purchased from Beijing Wei Tong Li Hua Experimental Animal Technology Co. LTD (Beijing, China). Male Ldlr<sup>-/-</sup> mice in C57BL/6 background at the age of 8-wk were purchased from the Animal Model Institute, Nanjing University (Nanjing, China). UCP1<sup>-/-</sup> mice in C57BL/6 background were kindly provided by Pennington Biomedical Research Center (Baton Rouge, LA). Mice were sacrificed by anesthetizing with intraperitoneal (i.p.) injection of 0.8% pentobarbital sodium (60 mg/kg), followed by cervical dislocation. All animal and human studies were complied with the Management Rules of the Chinese Ministry of Health and approved by the Ethical Committee of Shandong University Qilu Hospital.

### **Reagents**

Antibodies used in this study include: A rat anti-mouse PECAM-1 (CD31) monoclonal antibody (BD Pharmingen, San Diego); a rat anti-mouse monoclonal [MOMA-2] monocyte/macrophage antibody (AbD Serotec, Oxford, UK); a rabbit anti-mouse  $\alpha$ -SMA antibody (Abcam, Cambridge, UK); a rabbit anti-mouse UCP1 antibody (Abcam, Cambridge, UK); a rabbit anti-mouse endomucin antibody (eBioscience, San Diego) and an Alexa-488 green-labeled goat anti-rat IgG (Molecular Probes, CA). An instant Streptavidin-Peroxidase immunohistochemical kit (Zhongshan Goldenbrige Biotechnology Co.LTD, Beijing, China) was used for HRP staining.

### **Cold Acclimation**

Eight-wk-old male *wt*, *ApoE*<sup>-/-</sup>, *Ldlr*<sup>-/-</sup>, or *UCP1*<sup>-/-</sup> and *ApoE*<sup>-/-</sup> double knockout C57BL/6 mice caged in 22°C were fed with a high-fat-diet (0.25% cholesterol and 15% cocoa butter), (Beijing Wei Tong Li Hua Experimental Animal Technology Co. LTD, Beijing, China) for 4 wks. Each of the strain of mice was randomly divided into two groups (n=20/group) and switched to pair-fed or *ad libitum* feeding with regular diet. In some experimental settings, mice were fed with regular chow throughout the entire experiments. While one group of mice was exposed to 30°C for 4 or 8 wks, the other group were first adapted at 18°C for 1 week, followed by exposure to 4°C for another 3 or 7 wks. The 4°C-cold room was equipped with a ventilation system that allowed cold air to circulate in the room.

### **Tissue Sample Collection**

For collection of blood samples, animals exposed under different conditions were fasted overnight and anesthetized with 0.8% pentobarbital sodium (i.p, 60 mg/kg). Blood was intracardially collected using a syringe. After sacrificing animals, various adipose depots, heart, arteries and liver were dissected. For analysis of mRNA expression, tissue samples were immediately placed in liquid nitrogen. The samples were kept in -80°C until use. For histological analysis, samples were fixed with 4% paraformaldehyde overnight, followed by washing with 1x PBS. A portion of the samples was paraffin-embedded and the rest was used for cryosections.

### **Blood Lipid Analysis**

After collection of blood samples, plasma from each mouse was prepared and stored at -80°C until use. Free fatty acids were measured using a commercially available ELISA kit (Roche, Shanghai, China). Total plasma levels of cholesterol, TG, LDL-cholesterol, and high-density

lipoprotein cholesterol (HDL-C) were measured using commercially available agents (Zhejiang Dongou Biotechnology, Wenzhou, China).

FPLC chromatography was used for detailed analysis of various cholesterol components and TG (n=6/group). Briefly, a aliquot of 100  $\mu$ l of plasma was chromatographed on a Superose 6 HR10/300 GL column (GE Healthcare, Sweden) and eluted with 1x PBS (PH 7.2) at a speed of 0.5 ml/min. A total number of 60 fractions (0.5 ml/fraction) were collected, and each fraction was analyzed for cholesterol and TG concentrations using standard ELISA Kits (Cayman, Florida). Values from fractions 5-10 were used for calculation of VLDL/IDL, whereas fractions 11-19 and fractions 20-30 represent LDL and HDL respectively.

### **In Vivo Cholesterol Synthesis**

Various groups of ApoE<sup>-/-</sup> mice (n=6/group) were injected (i.p.) with 20 mCi of [<sup>3</sup>H]water (PerkinElmer, USA) in 0.1 ml of phosphate saline. One hour after injection, mice were anesthetized and blood samples were immediately collected and used for measurement of plasma [<sup>3</sup>H]. Liver tissues were homogenized and 200–300 mg of homogenate portions were saponified, and the digitonin-precipitable sterols were isolated as previously described (Dietschy and Spady, 1984). The rates of hepatic cholesterol synthesis were calculated as the mmol of [<sup>3</sup>H]water incorporated into digitonin-precipitable sterols per hour per gram of tissues.

### **Measurement of cAMP and Glycerol**

Tissue homogenates from eWAT exposed to different temperatures were used to measure the levels of cAMP using a commercially available kit (Cayman, Florida). For detection of glycerol, adipocytes from eWAT were isolated using collagenase II digestion (0.25 mg/ml) at

37°C for 1 h. The single cell suspension was cultured at 37°C for 1 h in the presence or absence of isoproterenol in an AIS buffer containing 125 mM NaCl, 5 mM KCl, 1 mM CaCl<sub>2</sub>, 2.5 mM MgCl<sub>2</sub>, 1 mM KH<sub>2</sub>PO<sub>4</sub>, 2% BSA, 4 mM glucose, and 25 mM Tris (pH 7.4). The released glycerol was measured using a commercial kit (Sigma, Shanghai, China).

### **Indirect Calorimetry**

Oxygen consumption was measured using an open-circuit system (Sable, USA) as previously described (Xue et al., 2009). Prior to measurement, mice were anesthetized by i.p. injection with pentobarbital at the dose of 90 mg/kg. Animals were immediately transferred to a 33°C metabolic chamber, where O<sub>2</sub> consumption and release of CO<sub>2</sub> were uninterruptedly recorded for 30 min. At the end of 30 min, a single subcutaneous injection of NE at the dose of 20 µg/20g-mouse was administrated. O<sub>2</sub> consumption and release of CO<sub>2</sub> were further recorded for successive 90 min.

### **Histological Staining**

Some tissue samples were stained with H&E using a standard protocol. Oil red O (Sigma, Shanghai, China) at the final concentration of 0.5% was used to stain tissue sections (5 µm thickness) for 10 min. The stained samples were washed with 37°C water for a few seconds. The samples were counter-stained with hematoxylin. Picrosirius red (Sigma, Shanghai, China) at the final concentration of 0.5% was used for staining collagens.

### **Immunohistochemistry**

Tissues prepared from cryosections or paraffin-embedded samples (5 µm thickness) were immunohistologically stained with various primary antibodies including a non-immune IgG (see above), followed by further staining with secondary antibodies as previously described

(Zhang et al., 2010; Zhang et al., 2011). For staining of blood vessels in the adipose tissue, the whole-mount technology was used and the positive signals were detected using a confocal microscope (Zeiss-710, Zeiss, Germany). Atherosclerotic plaque instability index was calculated according to the standard formula: (Oil Red O<sup>+</sup> signal plus MOMA-2<sup>+</sup> signal)/ (α-SMA<sup>+</sup> signal plus collagen I<sup>+</sup> signal) (Zhang et al., 2010).

### **Statistical Analysis**

The data were shown as mean determinants ± SEM. Variables with skewed distribution were analyzed by the Mann-Whitney test. For normal distribution data, differences between two groups were assessed by unpaired Student's *t*-test, and comparison of multiple groups involved the use of ANOVA.

## **SUPPLEMENTAL REFERENCES**

Dietschy, J.M., and Spady, D.K. (1984). Measurement of rates of cholesterol synthesis using tritiated water. *J. Lipid Res.* 25, 1469-1476.

Xue, Y., Petrovic, N., Cao, R., Larsson, O., Lim, S., Chen, S., Feldmann, H.M., Liang, Z., Zhu, Z., Nedergaard, J., et al. (2009). Hypoxia-independent angiogenesis in adipose tissues during cold acclimation. *Cell Metab.* 9, 99-109.

Zhang, C., Zhao, Y.X., Zhang, Y.H., Zhu, L., Deng, B.P., Zhou, Z.L., Li, S.Y., Lu, X.T., Song, L.L., Lei, X.M., et al. (2010). Angiotensin-converting enzyme 2 attenuates atherosclerotic lesions by targeting vascular cells. *Proc. Natl. Acad. Sci. USA* 107, 15886-15891.

Zhang, D., Hedlund, E.M., Lim, S., Chen, F., Zhang, Y., Sun, B., and Cao, Y. (2011). Antiangiogenic agents significantly improve survival in tumor-bearing mice by increasing tolerance to chemotherapy-induced toxicity. *Proc. Natl. Acad. Sci. USA* 108, 4117-4122.
